# Supplementary material for: MOF derived CoP-decorated nitrogen-doped carbon polyhedrons/reduced graphene oxide composites for high performance supercapacitors
Source: Royal Society of Chemistry journal article supplement (doi:10.1039/c9dt01629e), 2019-01-01
Supplement: c9dt01629e1.pdf [file c9dt01629e1.pdf]

## Supporting Information:

# MOFs Derived CoP-decorated Nitrogen-doped Carbon Polyhedrons/Reduced Graphene Oxide Composites for High Performance Supercapacitors

*Jun Zhu<sup>a</sup>, Xiaoping Shen\*<sup>a</sup>, Lirong Kong<sup>a</sup>, Guoxing Zhu<sup>a</sup>, Zhenyuan Ji<sup>a</sup>, Keqiang Xu<sup>a</sup>, Baolong Li<sup>b</sup>, Hu Zhou<sup>c</sup> and Xiaoyang Yue<sup>a</sup>*

<sup>a</sup> School of Material Science and Engineering, School of Chemistry and Chemical Engineering, Jiangsu University, Zhenjiang 212013, P. R. China

<sup>b</sup> State and Local Joint Engineering Laboratory for Functional Polymeric Materials, College of Chemistry, Chemical Engineering and Materials Science, Soochow University, Suzhou 215123, P. R. China

<sup>c</sup> School of Material Science and Engineering, Jiangsu University of Science and Technology, Zhenjiang 212003, P. R. China

\* Corresponding author. Tel.: +86 511 88791800; Fax: +86 511 88791800

E-mail address: xiaopingshen@163.com (Xiaoping Shen)

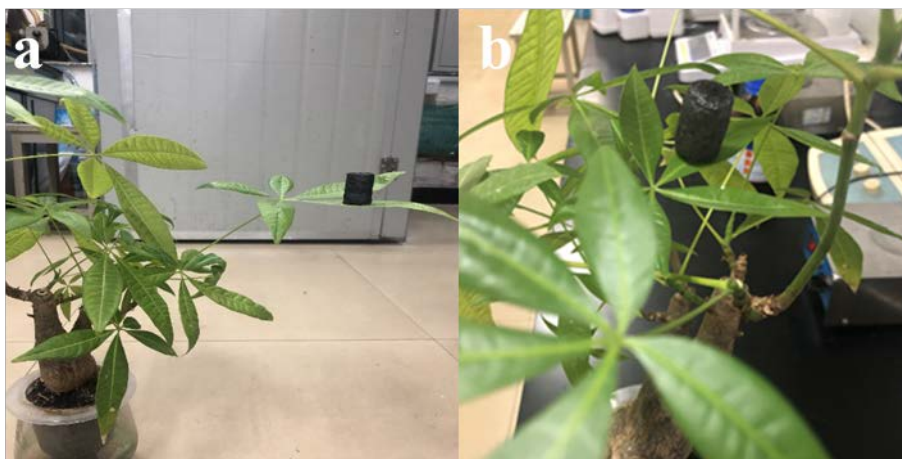

**Figure S1.** Digital pictures of the CoP-NPC/RGO composite showing the 3D structure and light weight.

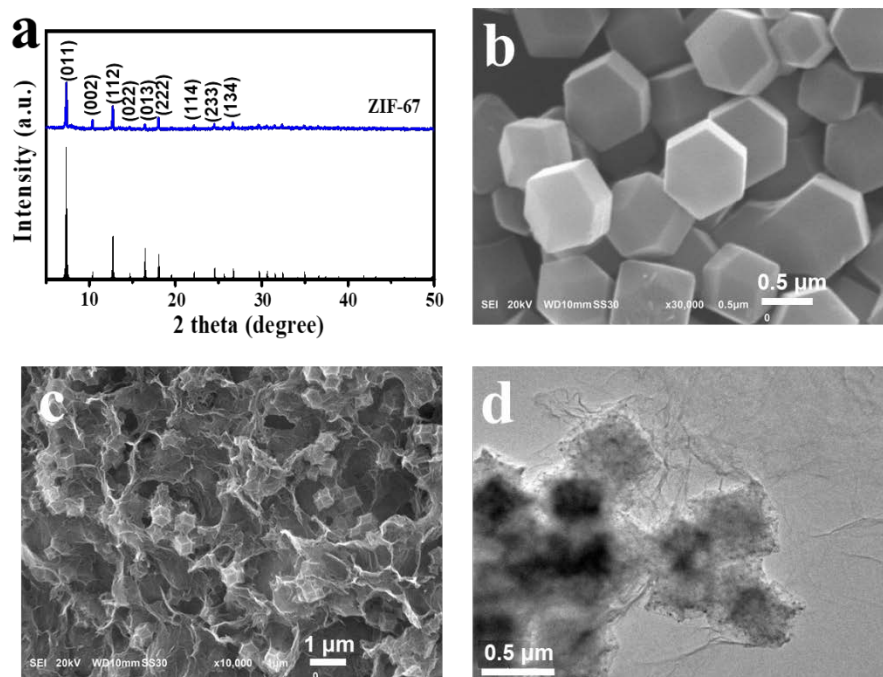

**Figure S2.** (a) XRD pattern and (b) SEM image of ZIF-67. (c) SEM and (d) TEM images of Co-NPC/RGO.

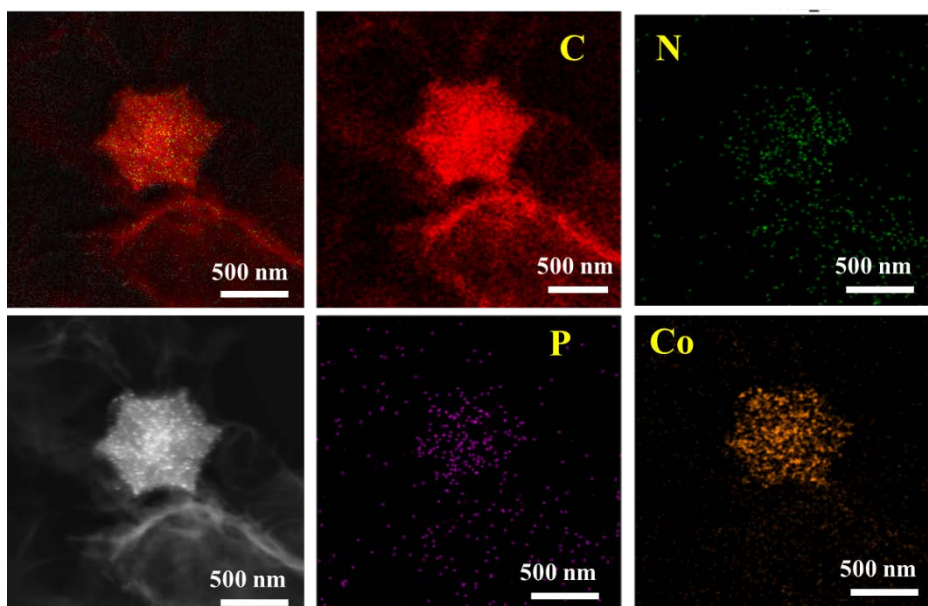

**Figure S3.** TEM elemental mapping of CoP-NPC/RGO.

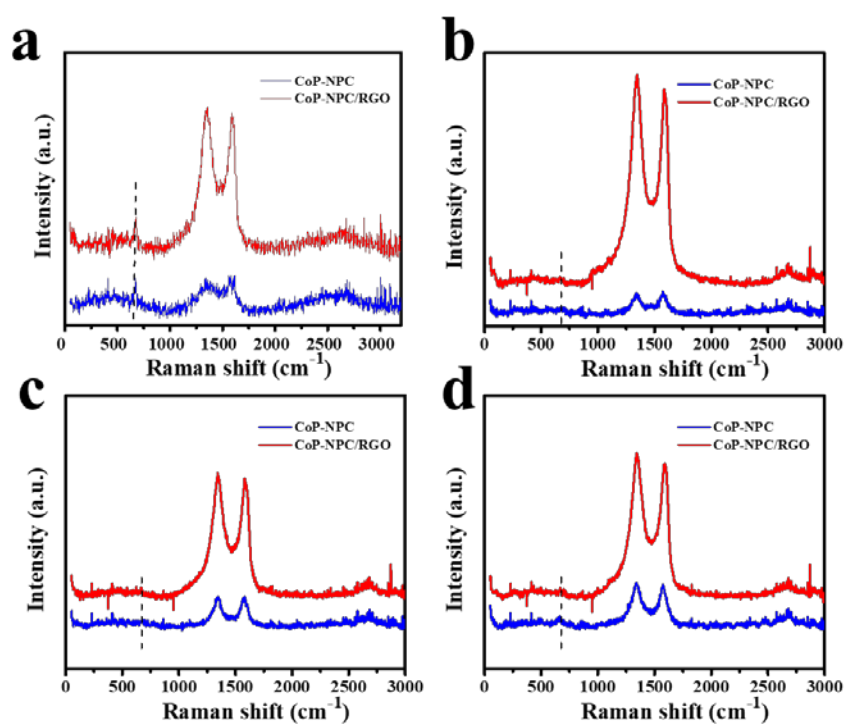

**Figure S4.** (a-d) Raman spectra of CoP-NPC and CoP-NPC/RGO collected at different areas.

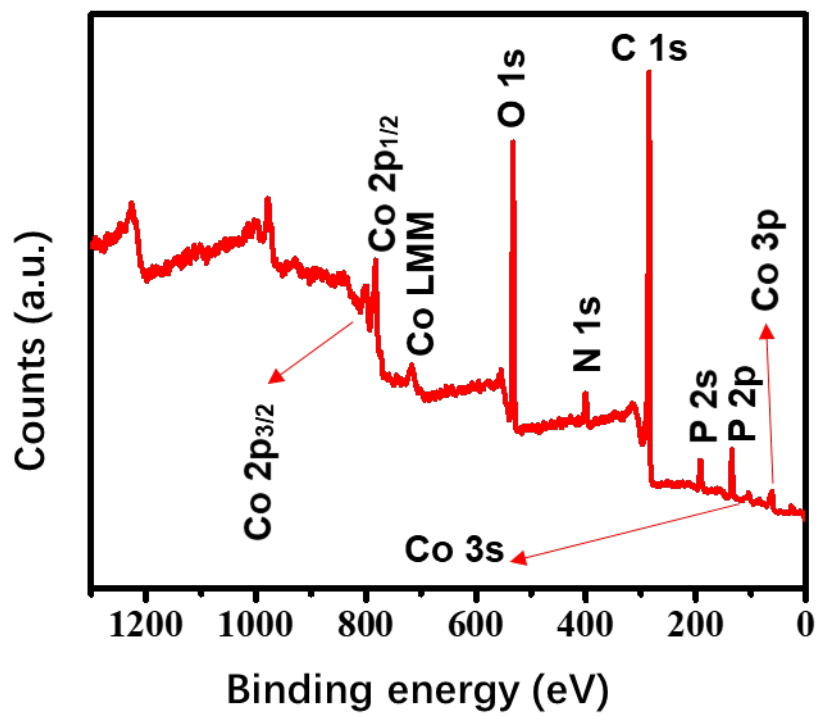

**Figure S5.** XPS survey spectrum of CoP-NPC.

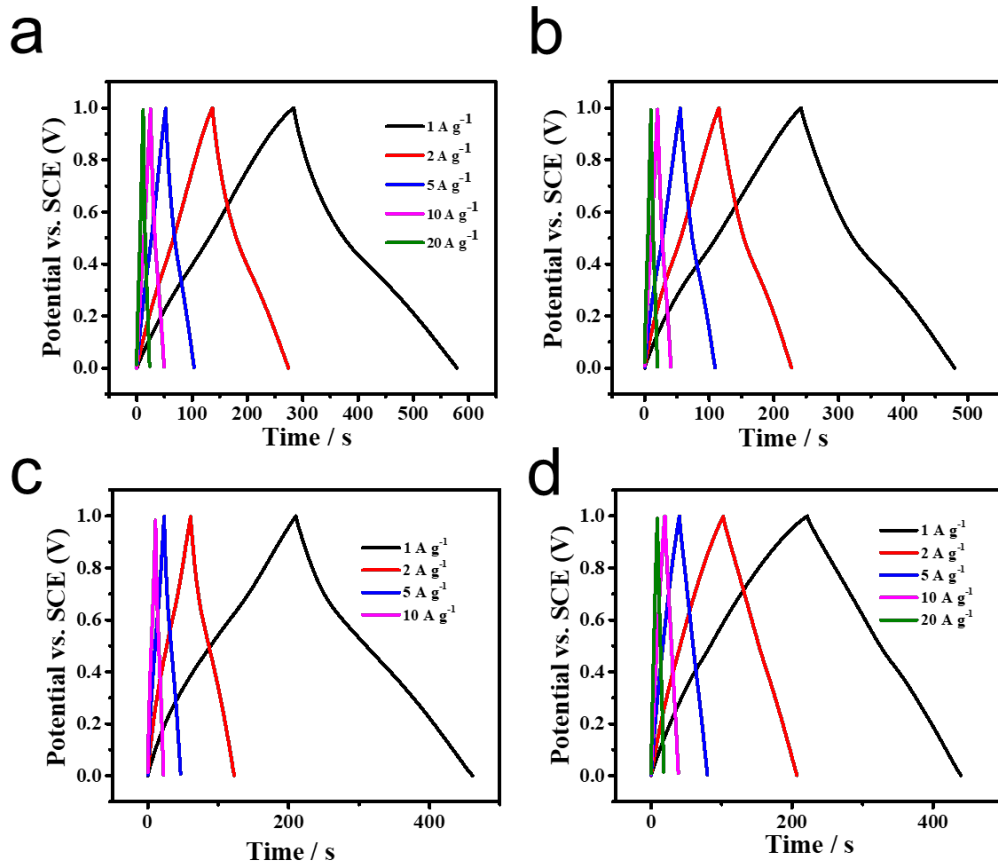

**Figure S6.** GCD curves of (a) CoP-NPC/RGO-1, (b) CoP-NPC/RGO-2, (c) Co-NPC/RGO and (d) CoP-NPC electrodes at different current densities.

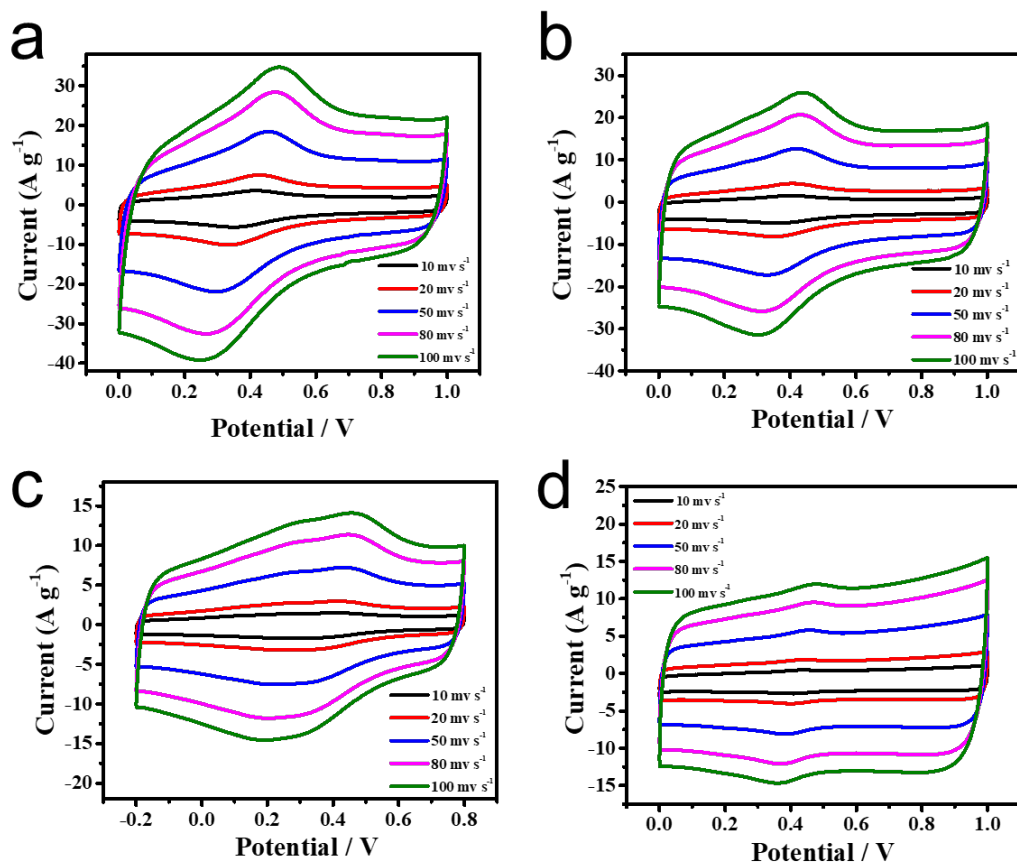

**Figure S7.** The CV curves of the as-prepared electrode materials of (a) CoP-NPC/RGO-1, (b) CoP-NPC/RGO-2, (c) Co-NPC/RGO and (d) CoP-NPC at various scan rates ranging from 10 to 100  $\text{mV s}^{-1}$ .

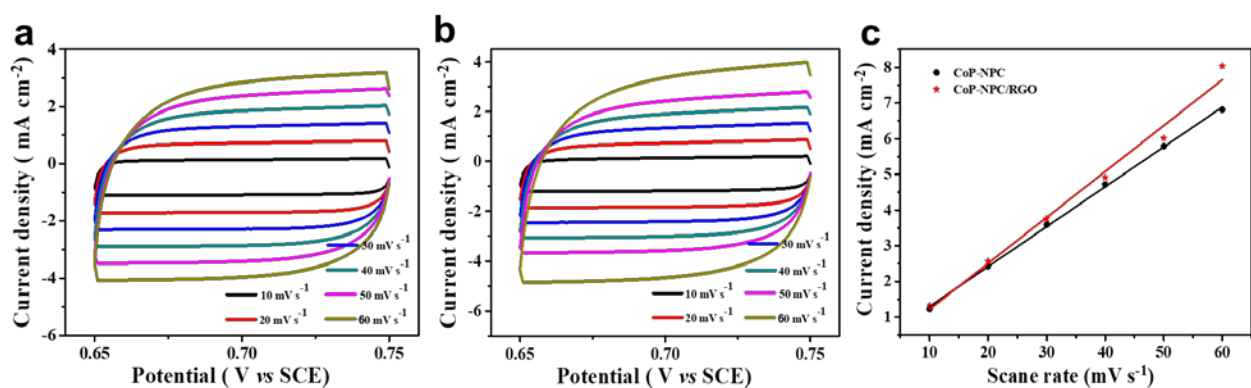

**Figure S8.** The CV curves of (a) CoP-NPC and (b) CoP-NPC/RGO at different scanning rates; (c) Double layer capacitance ( $C_{dl}$ ) values obtained by plotting the current density vs scanning rate at 0.70 V.

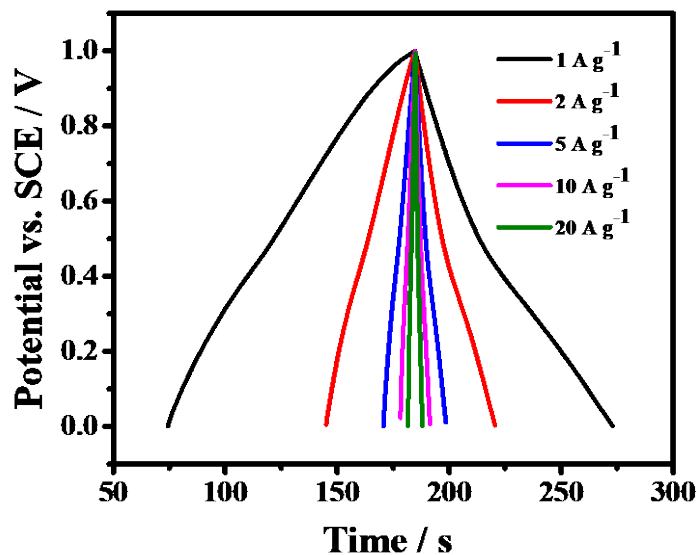

**Figure S9.** Electrochemical performances of CoP-NPC/RGO based symmetric supercapacitor measured in a 2032 coin-type system. Charge-discharge curves at different current densities.

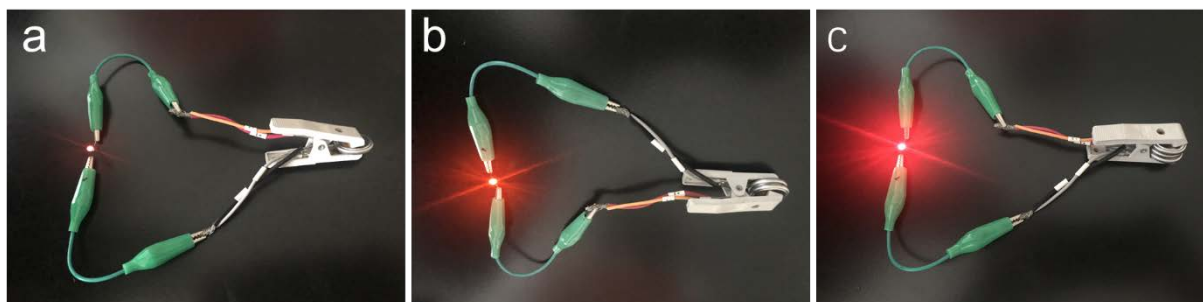

**Figure S10.** The digital pictures of the different numbers of coin-type cells light up the LED light.



**Table 1.** A comparison of the specific capacitances between the as-prepared CoP-NPC/RGO and other MOFs-derived electrode materials reported previously.

| Sample                                        | Electrolyte solution                 | Specific Capacitance                              | Refs.            |
|-----------------------------------------------|--------------------------------------|---------------------------------------------------|------------------|
| N-doped porous carbon                         | 1 M H <sub>2</sub> SO <sub>4</sub>   | 305 F g <sup>-1</sup> at 1 A g <sup>-1</sup>      | 34               |
| Co/Zn-ZIF-derived NPC                         | 0.5 M H <sub>2</sub> SO <sub>4</sub> | 286 F g <sup>-1</sup> at 2.5 A g <sup>-1</sup>    | 35               |
| TE-MOF5 derived NPC                           | 6 M KOH                              | 271 F g <sup>-1</sup> at 0.25 A g <sup>-1</sup>   | 36               |
| MOF-2 derived NPC                             | 1 M H <sub>2</sub> SO <sub>4</sub>   | 170 F g <sup>-1</sup> at 1 A g <sup>-1</sup>      | 37               |
| NiO/Co <sub>3</sub> O <sub>4</sub> hybrids    | 6 M KOH                              | 405 F g <sup>-1</sup> at 1 A g <sup>-1</sup>      | 38               |
| R- Co <sub>3</sub> O <sub>4</sub>             | 1 M KOH                              | 329 F g <sup>-1</sup> at 1 A g <sup>-1</sup>      | 39               |
| Co-BDC derived Co <sub>3</sub> O <sub>4</sub> | 2 M KOH                              | 137.2 F g <sup>-1</sup> at 0.5 A g <sup>-1</sup>  | 40               |
| CoP-350 °C                                    | 6 M KOH                              | 427.6 F g <sup>-1</sup> at 1 A g <sup>-1</sup>    | 41               |
| CoP/CC                                        | 6 M KOH                              | 342.8 F g <sup>-1</sup> at 1 A g <sup>-1</sup>    | 42               |
| <b>CoP-NPC/RGO</b>                            | 1 M H <sub>2</sub> SO <sub>4</sub>   | <b>466 F g<sup>-1</sup> at 1 A g<sup>-1</sup></b> | <b>This work</b> |
